## 17 **Abstract**

18 Mayaro virus (MAYV) is an emergent arthropod-borne virus that causes an acute febrile illness  
19 accompanied by arthralgia, similar to chikungunya virus. Increasing urbanization of MAYV outbreaks in  
20 the Americas has led to concerns that this virus could further expand its geographic range. Given the  
21 potential importance of this pathogen, we sought to fill some critical gaps in knowledge regarding MAYV  
22 infectivity and geographic variation. This study describes the cytopathogenicity of MAYV in human dermal  
23 fibroblasts, human skeletal muscle satellite cells, human embryonic kidney cells (HEK), peripherally  
24 derived human macrophages, and Vero cells. MAYV strain isolated from Bolivia (MAYV-U) infected cells  
25 more rapidly compared to MAYV strains isolated in Peru and Brazil (MAYV-P; MAYV-B), with high titers  
26 ( $1 \times 10^8$  pfu/ml) peaking at 37 hours post infection. MAYV-U also caused the most cytopathic effect in a  
27 time dependent manner. Furthermore, differently from the other two prototypic strains, MAYV-U harbors  
28 unique mutations in the E2 protein, D60G and S205F, likely to interact with the host cell receptor, which  
29 may explain the observed differences in infectivity. We further demonstrate that pre-treatment of cells with  
30 interferon- $\beta$  inhibited viral replication in a dose-dependent manner. Together, these findings advance our  
31 understanding of MAYV infection of human target cells and provide initial data regarding MAYV  
32 phenotypic variation according to geography.

## 33 **Author Summary**

34 Arthropod-borne viruses are of great public health concern, causing epidemics worldwide due to climate  
35 change, changes in land use, rapid urbanization, and the expanding geographic ranges of suitable  
36 vectors. Among these viruses, Mayaro is an emerging virus for which little is currently known. This study  
37 aims to answer fundamental questions of Mayaro virus biology using three geographically distinct viral  
38 strains to examine variability in infection kinetics and infectivity in susceptible cell types. We found one  
39 geographic isolate to have accelerated infection kinetics and increased cell damage because of infection.  
40 To better understand what was unique about this isolate, we compared their envelope protein, which is  
41 critical for entry into a cell. We found that the isolate with increased replication kinetics possessed  
42 mutations at sites that may promote viral entry, which could explain these findings. Together, these  
43 findings further our understanding of Mayaro virus biology and provide insight into factors that contribute  
44 to Mayaro transmission and infectivity.

## 45 **Introduction**

46           Mayaro virus (genus *Alphavirus*, family *Togaviridae*; MAYV) is an emerging arthropod-borne virus  
47 transmitted by *Haemagogus* mosquitoes in forest regions of Central and South America (1) and the  
48 Caribbean (2,3). Similar to other Old World alphaviruses such as chikungunya virus (CHIKV), MAYV  
49 infection leads to fever, maculopapular rash, and persistent arthralgias (4). In most symptomatic cases,  
50 alphavirus infections are acute and self-limited. However, reports of lasting arthritis, neurological  
51 complications, myocarditis and even death have also been reported (5–8). Despite this, neither MAYV  
52 epidemiology nor virology is well characterized (5–8). A recent publication by *Bengue et al.* characterized  
53 MAYV infection in human chondrocytes, fibroblasts, and osteoblasts by examining replication kinetics and  
54 upregulation of proinflammatory cytokines and arthritis related genes due to infection (9). Their study,  
55 along with ours, aims to further our understanding of MAYV pathogenesis and the risk it poses to human  
56 health.

57           MAYV was first isolated in Trinidad and Tobago in 1954 (3). It has been found in several  
58 countries following its discovery, including Bolivia (10), French Guiana (11), Peru (12), Venezuela (13),  
59 and Brazil, with seropositivity in endemic areas such as Brazil ranging from 5% to as high as 60% (4). An  
60 increasing number of MAYV infections have been reported from peri-urban areas signaling a possible  
61 adaptation of the virus from a sylvatic to a grassland ecology, indicating a potential expansion of its  
62 geographic range (14). This expansion is further supported by the recent detection of MAYV in Haiti and  
63 Mexico (2,14,15).

64           Phylogenetic analysis classifies MAYV into three genotypes: D (dispersed, MAYV-D) and L  
65 (limited, MAYV-L) (4), named on the basis on their geographic distribution, and the N (new) genotype  
66 recently identified (1). L/D hybrid genotypes have also been described, which emerged from  
67 recombination events in the Amazon basin (16). The main D and L genotypes have coexisted for decades  
68 in the Pan-Amazonian region and are hypothesized to use sloths, marmosets, and other non-flying  
69 mammals to help sustain their independent enzootic transmission cycles (17). Populations infected with  
70 each genotype did experience viral flow (migration) events during their coexistence, yet their genomic  
71 sequences remain highly similar to one another, suggesting strong selective negative/purifying pressure  
72 that would hinder significant divergence over time (17). While phylogeny and evolutionary dynamics of

73 such genotypes have been well characterized, no studies have investigated to our knowledge how the  
74 existing, albeit small, genetic diversity may impact pathogenesis or viral fitness in either *in vitro* or *in vivo*  
75 model systems.

76 Our aim is to characterize the infectivity of distinct geographic MAYV isolates in human cell lines  
77 and to identify specific features of the envelope polyprotein sequences that may contribute to any  
78 differences seen. We predict that these differences, if they exist, may result from variability in the intrinsic  
79 cellular antiviral response, viral entry, post entry barriers to productive infection, or any combination of  
80 these factors. This study also examines the MAYV envelope protein to determine whether selective  
81 pressures have induced diversifying selection in key regions relevant to viral binding and target cell  
82 infection. Together, our findings serve as part of the foundation to better understand MAYV pathogenesis,  
83 host/vector susceptibility, and geographic expansion, which are critical for characterizing MAYV and the  
84 risk it poses.

85

86 **Methods**

87 **Cells**

88 Vero E6 cells (ATCC) and HEK293T cells (kindly provided by Dr. David Pascual) were cultured at 37°C  
89 with 5% CO<sub>2</sub>. Both were maintained in Corning Dulbecco's modified Eagle's medium (DMEM) with L-  
90 Glutamine, 4.5g/L Glucose and Sodium Pyruvate, supplemented with 5% EqualFETAL™ (Atlas  
91 Biologicals, Fort Collins, CO), 1% Penicillin-Streptomycin (Thermo Fisher Scientific, Waltham, MA) and an  
92 additional 1% L-Glutamine (Thermo Fisher Scientific, Waltham, MA).

93 Normal Adult Human Dermal Fibroblasts and Normal Human Skeletal Muscle Satellite Cells (SkMc)  
94 (Lifeline Cell Technologies, USA) were cultured using FibroLife S2 Medium and StemLife SK Medium,  
95 respectively.

96 To obtain macrophages, peripheral blood monocytes (PBMCs) were isolated from the whole blood of  
97 healthy donors using an EasySep Direct Human PBMC Isolation Kit (StemCell Technologies) through  
98 negative selection. Following isolation, PBMCs were plated in flasks for monocyte adhesion and the M1  
99 Macrophage Differentiation Kit (PromoCell, USA) was used to differentiate macrophages from monocytes.

100

101 **Ethics**

102 Ethics approval for PBMC isolation from healthy blood donors was obtained from the University of Florida  
103 Institutional Review Board (IRB 201600448). Study participation was voluntary, and written informed  
104 consent was obtained from adults (18 years of age and older). Only adult (age of 18 years and older)  
105 participants were involved.

106

107 **Virus and Propagation**

108 Mayaro virus (1955 Uruma, Bolivia) designated as MAYV-U was purchased from BEI Resources (NR-  
109 49914, USA). Mayaro virus (2000 Loreto, Peru) designated as MAYV-P and Mayaro virus (1955 Para,  
110 Brazil) designated as MAYV-B were obtained from World Reference Center for Emerging Viruses and  
111 Arboviruses (WRCEVA; MAYV IQU3056 and MAYV BeH407 respectively). These viruses were all  
112 isolated from humans.

113 Each vial of virus was resuspended in DPBS without Ca/Mg and propagated in Vero cells in DMEM  
114 prepared as previously described. Supernatants from the infected cell culture were subsequently  
115 harvested 48, 72, and 96 hours (hrs) from MAYV-U, MAYV-P, and MAYV-B isolates respectively,  
116 centrifuged at 1200 xg for 15 minutes to remove any remaining cell debris, and frozen at -80°C. Prior to  
117 use, vials containing virus were thawed once at 37°C and never refrozen.

118

### 119 **MAYV Titration and Plaque Assay**

120 Serial dilutions (10-fold) of harvested virus supernatant (200 uL) were added to individual wells in  
121 duplicate to Vero cells grown to 100% confluence in 12-well plates. An additional 200 uL of prepared  
122 DMEM was added to each well to prevent the cells from drying out. The plates were incubated at 37°C,  
123 5% CO<sub>2</sub> for 1 hr to allow for viral adsorption before the media was aspirated and replaced with 0.5 ml of  
124 1% methyl-cellulose medium (5% EqualFETAL™, 2% Pen Strep, 2% L-Glut in 2x E-MEM). Cells were  
125 incubated for 3 days before the media was removed and stained with 0.25% crystal violet (30% methanol;  
126 70% dH<sub>2</sub>O) for 30 minutes. The crystal violet was then aspirated and the plates were washed with water.  
127 Plaques were counted manually and the concentration in plaque-forming units/ml (pfu/ml) was calculated.

128

### 129 **Immunofluorescence Microscopy**

130 Cells were grown on 12mm culturable coverslips coated with Poly-D-Lysine (Neuvitro, Camas, WA). Once  
131 cells reached 80% confluence, they were infected at a multiplicity of infection (MOI) of 1 for 24, 48, and  
132 72 hrs for immunofluorescent staining. Infected media was aspirated and the cells were fixed with 4%  
133 paraformaldehyde (PFA) for 15 minutes. The PFA was aspirated and the cells gently washed with DPBS  
134 w/o Ca/Mg. To permeabilize cell membranes, 0.1% Triton X-100 was added for 15 minutes, and then  
135 removed before the cells were washed again as before.. Triton X-100 was removed and the cells were  
136 washed again. To block nonspecific antibody binding, 0.5 ml of 3% BSA in DPBS was added for 1 hr. For  
137 viral antigen staining, the primary antibody, Anti-Eastern Equine Encephalitis clone 1A4B-6 Mab IgG2b  
138 was added to the cells at a dilution of 1:1000 and incubated for 1 hour. This antibody reacts with an E1  
139 epitope shared by all alphaviruses. Next, the cells were washed with DPBS before an hour incubation  
140 with a 1:1000 dilution of Goat anti-Mouse IgG (H+L), Alexa Fluor 488 (Invitrogen, Carlsbad, CA).

141 Following incubation, the secondary antibody was aspirated, and DAPI at a dilution of 1:1000 was added  
142 for 15 minutes. To view the cells, coverslips were mounted to a microscope slide using Prolong TM Gold  
143 Antifade Mountant (ThermoFisher, Waltham, MA). Microscope slides were imaged using an Olympus IX-  
144 81 DSU Spinning Disk Confocal microscope under 20x, using Z-Stack and imaged without gamma.  
145 Images were edited by creating projection images from the Z-Stacks, which were then deconvoluted and  
146 re-normalized. Exposure conditions were kept consistent within a microscopy session.

147

#### 148 **Viral Replication Kinetics and Cytopathic Effect Staining**

149 Cells were grown in T-25 flasks to 100% confluence. One flask was used for each time point and viral  
150 isolate. A total of 13 time points at 6-hr intervals from 0-72 hrs (with uninfected controls) were performed  
151 in duplicate. Before inoculation at time zero, the growth media was removed and replaced with fresh  
152 media. Cells were then infected at a MOI of 1 and incubated at 37°C, 5% CO<sub>2</sub> for a 1 hour adsorption  
153 period. Uninfected cells received fresh media and were incubated for the same amount of time. Following  
154 incubation, the media was removed from all flasks, the cells were washed with DPBS w/o Ca/Mg, and  
155 then replenished with fresh media. At the corresponding time points, the media was collected by  
156 aspiration and placed individually in 15 mL centrifuge tubes. Tubes were then centrifuged at 1200 xg for  
157 15 minutes to remove any remaining cell debris, and cryovials were prepared using the supernatant,  
158 which were subsequently stored at -80°C. To determine viral titer, one vial of frozen supernatant was  
159 thawed, serially diluted, and added in duplicate to 12-well plates following the protocol described in the  
160 MAYV Titration and Plaque Assay section.

161 To characterize viral cytopathic effects (CPE), 0.25% crystal violet containing 30% methanol was added  
162 to each flask for 30 minutes. To titer the harvested supernatants, plaque assays were performed on Vero  
163 cells following the same protocol as previously mentioned.

164

#### 165 **Type I/II IFN Sensitivity Assay: Pre-treatment vs Post-treatment**

166 To assess the role of interferon (IFN) in MAYV infection, we followed the methods of *Fros et al* (18).  
167 In brief, for IFN pre-treatment, cell lines were grown in 24-well plates to 100% confluence and IFN- $\beta$  or  
168 IFN- $\gamma$  was added in duplicate at 2, 20, 200, and 2000 units/ml for 6 hours. Old media containing IFN was

169 removed and cells were washed once with DPBS w/o Ca/Mg. Medium containing MAYV-U at a MOI of 1  
170 was then added for a 3-hr adsorption at 37°C and 5% CO<sub>2</sub>. Following adsorption, cells were rewashed  
171 once with DPBS, fresh media was added, and then incubated for 21 hours at 37°C and 5% CO<sub>2</sub>. After 21  
172 hours, supernatants were harvested, centrifuged at 1200 xg for 10 minutes and frozen at -80°C (18).  
173 To assess viral replication in cells treated with IFN after infection, cells were infected first with MAYV-U at  
174 a MOI of 1 for a 4-hr adsorption at 37°C and 5% CO<sub>2</sub>. Cells were then washed with DPBS and fresh  
175 media containing IFN-β or IFN-γ was added at the aforementioned concentrations in duplicate for a 21-hr  
176 incubation. After 21 hrs, supernatants were harvested, centrifuged at 1200 xg for 10 minutes and frozen  
177 at -80°C (18). All supernatants were titered following the plaque assay protocol described earlier.

178

### 179 **Viral genes Sequencing**

180 Total RNA of each isolate was extracted from frozen virus stock using QIAamp Viral RNA Mini Kit  
181 (Qiagen, Germantown, MD) following the manufacturers spin protocol. RNA concentration and quality  
182 were measured by Qubit® 2.0 (Life Technologies, Carlsbad, CA) and spectrophotometry (DeNovix® DS-  
183 11 FX). First-strand synthesis was performed with Superscript III First Strand Synthesis system (Thermo  
184 Fisher Scientific, Waltham, MA) using an oligo(dT)<sub>20</sub> primer in a BIO-RAD T100™ PCR thermocycler  
185 (BioRad, Hercules, CA) using a modified protocol for viral envelope protein. Briefly, the reactions were  
186 incubated at 50°C for a total of 180 minutes, with pausing the incubation after 90 min to add an additional  
187 2μL of SuperScript to each reaction to create full-length transcripts. The protocol otherwise followed  
188 manufacturer's instructions. Five overlapping primer pairs for the envelope protein of the D and L  
189 genotypes were constructed using MAYV reference sequences obtained from GenBank  
190 (<https://www.ncbi.nlm.nih.gov/genbank>) by identifying sections of homologous base pairs with similar  
191 melting temperatures (Table S1). The cDNA template for each isolate was PCR amplified using  
192 Platinum™ Green Hot Start PCR Master Mix (2X) (Invitrogen™, Carlsbad, CA) using 3 μl of template and  
193 following the manufacturer's instruction. The reaction was amplified using a BIO-RAD T100™ PCR  
194 thermocycler (BioRad, Hercules, CA) programmed for an initial desaturation at 94°C for 90 seconds,  
195 followed by 31 cycles using the following conditions: denaturation at 94°C for 30 seconds, annealing at  
196 51°C, 52°C or 58°C for 30 seconds, and extension at 72°C for extension. These cycles were followed by



197 a final extension step at 72°C for 5 min. The amplified PCR products were assessed for appropriate  
198 amplification by electrophoresis on a 1% TAE agarose gel containing 0.3µg/mL ethidium bromide.  
199 Reactions showing a single band at the appropriate molecular weight based on a 100bp ladder  
200 (Promega, Madison, WI) used for reference were purified using QIAquick PCR purification kit (Qiagen,  
201 Germantown, MD) following the manufacturer's instructions and concentrations determined by  
202 spectrometry (Devonix® DS-11 FX, Wilmington, DE). A single site for MAYV-P (site 5) required gel  
203 extraction due to the presence of a second band on the gel. The band of interest was extracted from the  
204 gel and purified using QIAquick Gel Extraction Kit (Qiagen, Germantown, MD) following the  
205 manufacturer's instructions. The purified PCR reactions were prepared for Sanger sequencing and sent  
206 to Genewiz following the company's instructions. Sequences were assessed using Geneious Prime  
207 2019.1.3. The reverse and forward sequences for each isolate were trimmed, aligned, and inspected for  
208 congruency, missing, or uncalled base pairs and manually edited based on the chromatogram results.  
209 The five segments of envelope sequence were then assembled into a single contig with the resulting  
210 contig spanning E3, E2, 6K, and E1 for each isolate. Sequences have been deposited in GenBank, with  
211 accessions numbers: MZ962428-MZ962430.

## 212 **Genetic and Structural Analysis**

213 In this study we analyzed E3-E2-E1 polyprotein of MAYV-U, MAYV-B and MAYV-P (Figure S1) from  
214 residue 10 of E3 to residue 423 of E1 (according to UniProt ID Q8QZ72). MAYV envelope gene  
215 sequences were used to infer the maximum likelihood phylogenetic relationship with IQ-TREE software  
216 (19) based on the best-fit model according to the Bayesian Information Criterion (BIC) (20) with ultrafast  
217 bootstrap approximation (21). Amino acid pattern along the phylogeny were identified by signature pattern  
218 analysis using VESPA (22) (<https://www.hiv.lanl.gov/content/sequence/VESPA/vespa.html>), while  
219 selection analyses was carried out with algorithms implemented in the HyPhy software (23)  
220 (<http://www.datamonkey.org/>), which estimate non-synonymous (dN) to synonymous (dS) codon  
221 substitution rate ratios ( $\omega$ ), where  $\omega < 1$  indicates purifying/negative selection and  $\omega > 1$  diversifying/positive  
222 selection. Fast Unconstrained Bayesian Approximation (FUBAR)(24) was also used for inferring  
223 pervasive selection, and the mixed effects model of evolution (MEME) (25) to identify episodic selection.  
224 Sites were considered to have experienced positive or negative selective pressure based on posterior  
225 probability (PP) > 0.90 for FUBAR, and likelihood ratio test  $\leq 0.05$  for MEME. The Cryo-EM structure of  
226 the mature and infective MAYV (PDB ID 7KO8, unpublished and available at  
227 <https://www.rcsb.org/structure/7KO8>) was used to map the mutations of interest within the 3D structure of  
228 E2 protein resolved with E1 and capsid proteins. Visualization of the atomic model, including figure and  
229 movie, is made with Chimera v1.12 (26).

230 **Results**

231 **MAYV envelope is detectable in all tested target cells except for macrophages**

232 Immunofluorescence (IF) microscopy showed that MAYV-U replicated in several tested target cells (Vero,  
233 HEK293T, fibroblasts, and SkMc) between 24 and 72 hours post infection (hpi). By 24 hpi, all samples  
234 had detectable viral envelope, the primary target of the host immune response, as indicated by the  
235 positive FITC (green) signal, which is suggestive of viral replication. As time progressed, the visible FITC  
236 signal increased, eventually peaking between 48 and 72 hpi. Within 24 hrs, infected fibroblasts had a  
237 substantial amount of detectable MAYV -E (Fig 1A), suggesting the cells were quickly infected. HEK cells  
238 also became infected within 24 hrs with some loss in cell density with increasing time, suggestive of  
239 MAYV induced cytopathic effects (Fig 1B). SkMc cells were readily infected based on detectable  
240 envelope at 24 hpi (Fig 1C). Viral envelope was not completely detectable on Vero cells at 24 hpi  
241 compared to other cell lines but was present on nearly all cells by 48 hpi, and it drastically reduced at 72  
242 hpi due to substantial cell death as shown by the lack of DAPI positive cells (Fig 1D). While some  
243 macrophages became infected with MAYV within the first 24 hpi, infection was only minimally detectable  
244 thereafter (Fig 1E). In fibroblasts and SkMc, as time progressed, we observed condensation and  
245 fragmentation of the nuclei, known as karyorrhexis and pyknosis, respectively, which suggested that the  
246 cells were undergoing apoptosis (Figs 1A & 1C).

247

248 **MAYV cytopathic effect varied marginally based on cell type and viral isolate**

249 For cell lines that had significant positive IF detection (SkMc, Fibroblasts, Vero, and HEK293T), CPE was  
250 examined between viral isolates to elucidate potential differences in virulence through crystal violet  
251 staining of infected monolayers of cells. MAYV isolates ranked from greatest to least CPE as follows:  
252 MAYV-U>MAYV-B>MAYV-P. However, after qualitatively visualizing disruption of a confluent cell  
253 monolayer and changes in cell morphology, we concluded that differences were minimal. With all viral  
254 isolates, Vero cells, which have no natural innate antiviral mechanisms, showed the greatest loss in cell  
255 viability (Fig 2A). HEK293T cells, however, showed little CPE across viral isolates (Fig 2B). Fibroblasts  
256 and SkMc both demonstrated significant changes in cell morphology and monolayer disruption (Figs 2C &  
257 2D).

258 **MAYV replication kinetics showed small differences between viral isolates**

259 Comparing slopes of infection kinetics for all three strains, we found that the MAYV-U isolate possessed  
260 the greatest rate of infection, followed by MAYV-B, and MAYV-P isolates (Fig 3). These differences in  
261 kinetics do not appear to impact peak titers as each strain reaches around  $10^8$  pfu/ml in all cell types  
262 tested, with peak titers occurring at approximately 30-40 hpi. Macrophage kinetics are not graphed  
263 because no increase in viral titers beyond inoculated amount was seen. When macrophages were  
264 infected with MAYV-U at an MOI=1, the viral titer at time 0 hpi was equal to  $7.65 \times 10^4$  pfu/ml, which  
265 declined to  $1.5 \times 10^4$  pfu/ml at 24 hpi, and further to  $4.5 \times 10^3$  pfu/ml and  $1.5 \times 10^2$  pfu/ml at 48 and 72 hpi,  
266 respectively. Both fibroblasts and SkMc, which are MAYV target cells, demonstrated the greatest rate of  
267 change during the first 12 hours of infection.

268

269 **Type I Interferon pre-treatment reduces viral replication**

270 Plaque assays from both Vero cells and fibroblasts have confirmed that pretreatment with IFN $\beta$  reduces  
271 viral replication in a dose-dependent manner (Fig 4). Pretreatment with IFN $\gamma$  yielded no reduction and  
272 post-treatment with either IFN $\beta$  or  $\gamma$  did not cause a significant reduction. HEK cells had no apparent  
273 reduction in viral titers regardless of the interferon used and timing of treatment. Treatment with IFN after  
274 infection did not cause as substantial of a reduction as pretreatment. The reduction that did occur with  
275 fibroblasts and Vero cells, though small, was dose dependent. HEK cells saw no change regardless of  
276 dose.

277

278 **Mutations in the E2 gene might influence viral fitness**

279 Phylogeny reconstruction based on MAYV envelope genes sequenced in this study confirmed that  
280 MAYV-U (fast replication) and MAYV-P (intermediate replication) strains belong to genotype D, while  
281 MAYV-B (slow replication) strain belongs to genotype L (17) (Figure S1). Signature pattern analysis,  
282 which identifies residues unique to MAYV-U, MAYV-P and MAYV-B, showed that amino acids implicated  
283 in disulfide bonds and cleavage of the E3, E2, E1 proteins are conserved among all isolates, as well as  
284 those modified by the host at the post-transcriptional level (N-linked (GlcNAc) asparagine or S-palmitoyl  
285 cysteine modifications). However, the analysis also highlighted several key residues within the envelope

286 region that distinguish MAYV-U from MAYV-P and MAYV-B (Figure S1). In particular, MAYV-U was the  
287 only isolate to have the following mutations in the E2 protein: the D60G mutation, responsible for  
288 switching aspartic acid for glycine in position 60, and the S205F mutation, introducing a phenylalanine  
289 instead of a serine in position 205 (Figure S1, Figure 5). Based on the experimental data, we  
290 hypothesized that these mutations may be possibly responsible for the observed *in vitro* differences in  
291 virus infection. Selection analyses, that determine whether observed frequency of mutational patterns in a  
292 specific site is expected under a neutral vs. a selection scenario (see Methods), did not find these sites to  
293 be under diversifying/positive selection. However, these mutations are of particular interest as E2 plays a  
294 role in viral attachment to the target host cell by binding the cell receptor (27). We further investigated  
295 how these mutations may affect the structure of the protein using the recently published crystal structure  
296 of E1-E2 MAYV (see Methods). The D60G mutation, which substitutes a negatively charged hydrophilic  
297 amino acid for a hydrophobic neutral amino acid, is located in the domain A; whereas S205F, that  
298 introduces a polar charged amino acid instead of an aromatic amino acid, is located in domain B of the  
299 amino-terminal region of the E2 glycoprotein (28,29). Based on the structural modeling, we conclude that  
300 the unique mutations found in MAYV-U, that map to the exposed region of the E2 glycoprotein facing  
301 cellular surface, are likely to alter the interaction of the virus with its host receptor and therefore may be  
302 related to differential fitness.

### 303 Discussion

304 Tropical regions in the Caribbean, Central and South America are considered high risk for MAYV  
305 emergence, yet little is currently known about MAYV pathogenesis. This is likely a result of a decreased  
306 perception of serious threat to human health. Some factors that led to this perception are MAYV's low  
307 viremia in humans, ineffectiveness as an urban virus, limited reach as a result of sylvatic transmission,  
308 and geographic restriction to mainly Central and South American rainforests (14,30). However, CHIKV  
309 also faced similar perceptions before mutations in the envelope protein (E1-A226V) resulted in its  
310 effective replication in the widespread vector, *Aedes albopictus*, increasing its geographic range and  
311 threat to global public health (31).

312 We addressed these gaps in the literature by investigating the *in vitro* cytopathogenicity and viral  
313 replication kinetics of MAYV in human cell lines. Our results show that fibroblasts and SkMc are highly  
314 susceptible to MAYV infection as shown through immunofluorescent visualization of MAYV-E within 24  
315 hpi. Infection of these cell types is important because fibroblasts are among the first cells in the body to  
316 come into contact with the virus upon inoculation from a mosquito taking a bloodmeal (32). Additionally,  
317 infection of SkMc likely contribute to the signs and symptoms that develop during infection (33). While we  
318 did not investigate cytokine secretion by infected fibroblasts and SkMc and their effects, *Bengue et al.*  
319 determined that MAYV-infected human chondrocytes have a substantially increased expression of  
320 proinflammatory cytokines IL-6 and TNF- $\alpha$ , both of which are mediators of arthritis (9). They genotype  
321 MAYV strain isolated in Haiti (2) in their experiments, and it remains to be understood if the results extend  
322 to MAYVD and MAYL.

323 In our study, Vero cells, SkMc and fibroblasts all experienced CPE, but to different degrees. Vero  
324 cells are a permissive cell line due to their inability to respond to viral infection through interferon  
325 production (34). As a result, Vero cells had rapid monolayer disruption, indicating cell death. HEK293T  
326 (human embryonic kidney epithelial cells) showed little CPE. This may be due to possible differences in  
327 interferon production. It is currently unclear whether HEK293T cells can produce Type I interferons. In  
328 addition to possible interferon production, the transformed nature of HEK293T may make them naturally  
329 more resistant to apoptotic signaling (35), therefore reducing the degree of CPE seen on infection.  
330 However, fibroblasts and SkMc cells experienced severe CPE, shown by substantial changes in cell

331 morphology, but fewer cells detached from the flask surface compared to Vero cells. A future study would  
332 be to qualify whether these cells are still alive, characterize their cytokine expression profile, and  
333 determine viral output for extended time points.

334 Our viral replication kinetics experiments revealed that peak viral titers vary by cell type within a  
335 margin of one log that could be explained by the cell's intrinsic biology and ease of viral entry/exit, etc.  
336 There is rapid replication and release of virus during the first 24 hours, which begins to slow and flatten  
337 after 24-30 hpi. Early replication was fastest for MAYV-U in all tested cell lines. While CHIKV can readily  
338 infect macrophages (36), our study showed MAYV infection is not productive in macrophages as seen by  
339 decreasing detection of viral envelope by immunofluorescence and decreasing viral titers with time. This  
340 may be explained by macrophage activation and a strong Type I interferon response that quickly  
341 dampened viral replication, rendering neighboring cells refractory to infection (37). It is also possible that  
342 MAYV can enter the cells, but it doesn't appear to be effectively replicating within macrophages.

343 To address the possibility of IFN influencing MAYV replication, we performed some preliminary  
344 studies to determine whether MAYV is sensitive to the effects of interferon. The IFN sensitivity assay  
345 showed a reduction in viral titers in Vero and fibroblasts cells pretreated with IFN- $\beta$  in a dose dependent  
346 manner; showing cells can respond to interferon and become more resistant to viral infection. However,  
347 this effect was not seen in IFN- $\beta$  post-treated cells. This suggests that MAYV replication may be  
348 interfering with the pathway, but it is unknown how efficient or strong this response is and how it fares in  
349 an *in vivo* system with several innate immune responses acting simultaneously. For example fibroblasts  
350 are known to secrete proinflammatory and antiviral cytokines such as IL-1, IL-6 and IFN- $\beta$ , which may  
351 serve as initiators of the innate immune response by activating and recruiting resident immune cells (38).  
352 It is also unknown what MAYV proteins may be responsible for the effect seen *in vitro* and these  
353 questions all call for further study. What is known, however, is that several other arboviruses such as  
354 chikungunya, dengue, Japanese encephalitis, and HHV-8 have developed interferon-evading  
355 mechanisms that aid their ability to reach high titer viremia (18,39).

356 Viral mutations may also explain the differences in MAYV infection between the different strains.  
357 We have shown that MAYV-U already has unique mutations in the E2 protein, D60G and S205F. The  
358 common property of the new substituted amino acids is the loss of charged residues. The domain A

359 contains the receptor binding site, (40) whereas domain B protects the fusion loop on the domain 2 of E1  
360 and involved in cellular attachment (28). It is possible that these mutations have the potential to enhance  
361 the host receptor binding during viral infection and facilitate viral entry into susceptible cells. A similar  
362 mutational substitution (D to G) has been reported for SARS-CoV-2, the D614G mutation (41), that alters  
363 fitness (42) and increased infectivity of the virus (43). How these mutations impact transmission remains  
364 to be studied. For example, future studies could investigate whether the signature residues distinguishing  
365 MAYV-D and MAYV-L, under diversifying selection (residue 381 in E2 protein, and 300 in E1) may  
366 increase vector susceptibility to infection and transmission and may explain the “dispersed” versus  
367 “limited” range of the genotypes. CHIKV faced limitations in invertebrate vectors and geographic range  
368 before mutations in the envelope protein (E1-A226V) enhanced its ability to infect *Aedes albopictus* (31).  
369 RNA viruses, such as yellow fever virus, MAYV, and CHIKV, rapidly accumulate errors in their genomes that  
370 are transmitted to progeny virions (44). However, strong purifying selection ensures that these mutations  
371 do not weaken their fitness for their insect or mammalian hosts (16,45).

372 While MAYV is predominantly maintained in a sylvatic cycle with periodic incidental human  
373 infection, anthropological and environmental changes such as land use, migration, rapid urbanization,  
374 and climate change may drive MAYV toward emergence as it is forced to adapt to new susceptible hosts,  
375 mosquito vectors, and conditions (46,47). *Aedes aegypti*, a far more urbanized and anthropophilic  
376 mosquito than *Haemagogus* mosquitoes, has been shown experimentally to be a competent vector for  
377 MAYV, but low viremic titers in humans serve as a barrier to establish infection from humans into the  
378 mosquito (48,49). Increased exposure between competent vectors and MAYV may benefit the already  
379 adaptable virus, allowing transmission to become more efficient, risking the establishment of an urban  
380 cycle. This transition has occurred before in CHIKV and yellow fever, among other viruses (49,50).  
381 Evidence of this occurring in MAYV may already exist as there are three reported cases of the virus in  
382 Haiti, without the existence of *Haemagogus* mosquitoes (2,16). This may be a sign that MAYV is adapting  
383 to other vectors such as *Aedes aegypti*. As such, we believe that our study, along with others,  
384 demonstrate the risk MAYV possesses in regard to its potential for expansion, adaptation, and suitability  
385 to several human target cells. These studies have created a strong foundation of knowledge regarding



386 MAYV, but we believe additional epidemiological, vector ecology, and virological studies are all warranted  
387 to better understand MAYV and its risk of emergence.

388

389 **Acknowledgements**

390 We would like to thank Aya Tal-Mason, Alexis Coican, Patricia Zielinski, and Andrew Chrystmann for their  
391 contributions and assistance in several experiments. We would also like to thank Dr. David Pascual and  
392 UTMB WRCEVA for providing the viruses used in this study.

393

394 **References**

- 395 1. Auguste AJ, Liria J, Forrester NL, Giambalvo D, Moncada M, Long KC, et al. Evolutionary and  
396 Ecological Characterization of Mayaro Virus Strains Isolated during an Outbreak, Venezuela, 2010 -  
397 Volume 21, Number 10—October 2015 - Emerging Infectious Diseases journal - CDC. [cited 2020  
398 Aug 13]; Available from: [https://wwwnc.cdc.gov/eid/article/21/10/14-1660\\_article](https://wwwnc.cdc.gov/eid/article/21/10/14-1660_article)
- 399 2. Blohm G, Elbadry MA, Mavian C, Stephenson C, Loeb J, White S, et al. Mayaro as a Caribbean  
400 traveler: Evidence for multiple introductions and transmission of the virus into Haiti. *Int J Infect Dis*  
401 *IJID Off Publ Int Soc Infect Dis.* 2019 Oct;87:151–3.
- 402 3. Anderson CR, Wattley GH, Ahin NW, Downs WG, Reese AA. Mayaro Virus: A New Human Disease  
403 Agent: II. Isolation from Blood of Patients in Trinidad, B.W.I.1. *Am J Trop Med Hyg.* 1957 Nov  
404 1;6(6):1012–6.
- 405 4. Azevedo RSS, Silva EVP, Carvalho VL, Rodrigues SG, Neto JPN, Monteiro HAO, et al. Mayaro  
406 Fever Virus, Brazilian Amazon - Volume 15, Number 11—November 2009 - Emerging Infectious  
407 Diseases journal - CDC. [cited 2020 Aug 13]; Available from:  
408 [https://wwwnc.cdc.gov/eid/article/15/11/09-0461\\_article](https://wwwnc.cdc.gov/eid/article/15/11/09-0461_article)
- 409 5. Pinheiro FP, Freitas RB, Rosa JFT da, Gabbay YB, Mello WA, LeDuc JW. An Outbreak of Mayaro  
410 Virus Disease in Belterra, Brazil. *Am J Trop Med Hyg.* 1981 May 1;30(3):674–81.
- 411 6. Theilacker C, Held J, Allering L, Emmerich P, Schmidt-Chanasit J, Kern WV, et al. Prolonged  
412 polyarthralgia in a German traveller with Mayaro virus infection without inflammatory correlates. *BMC*  
413 *Infect Dis.* 2013 Aug 8;13(1):369.
- 414 7. Obeyesekere I, Hermon Y. Arbovirus heart disease: Myocarditis and cardiomyopathy following  
415 dengue and chikungunya fever—A follow-up study. *Am Heart J.* 1973 Feb 1;85(2):186–94.
- 416 8. Acosta-Ampudia Y, Monsalve DM, Rodríguez Y, Pacheco Y, Anaya J-M, Ramírez-Santana C.  
417 Mayaro: an emerging viral threat? *Emerg Microbes Infect* [Internet]. 2018 Sep 26 [cited 2020 Aug  
418 13];7. Available from: <https://www.ncbi.nlm.nih.gov/pmc/articles/PMC6156602/>
- 419 9. Bengue M, Ferraris P, Baronti C, Diagne CT, Talignani L, Wichit S, et al. Mayaro Virus Infects Human  
420 Chondrocytes and Induces the Expression of Arthritis-Related Genes Associated with Joint  
421 Degradation. *Viruses* [Internet]. 2019 Aug 29 [cited 2021 Feb 20];11(9). Available from:  
422 <https://www.ncbi.nlm.nih.gov/pmc/articles/PMC6783875/>
- 423 10. Lema AB, Gajdusek DC, Eichenwald H, Schaeffer M. Epidemic Jungle Fevers Among Okinawan  
424 Colonists in the Bolivian Rain Forest: I. *Epidemiology.* *Am J Trop Med Hyg.* 1959 May 1;8(3):372–96.
- 425 11. Kazanji M, Bourreau E, Talarmin A, Shope RE, Lelarge J, Labeau B, et al. Mayaro virus fever in  
426 French Guiana: isolation, identification, and seroprevalence. *Am J Trop Med Hyg.* 1998 Sep  
427 1;59(3):452–6.
- 428 12. Buckley SM, Davis JL, Madalengoitia J, Flores W, Casals J. Arbovirus neutralization tests with  
429 Peruvian sera in Vero cell cultures. *Bull World Health Organ.* 1972;46(4):451–5.
- 430 13. Torres JR, Russell KL, Vasquez C, Barrera R, Tesh RB, Salas R, et al. Family Cluster of Mayaro  
431 Fever, Venezuela. *Emerg Infect Dis.* 2004 Jul;10(7):1304–6.
- 432 14. Lorenz C, Freitas Ribeiro A, Chiaravalloti-Neto F. Mayaro virus distribution in South America. *Acta*  
433 *Trop.* 2019 Oct 1;198:105093.

- 434 15. Navarrete-Espinosa J, Gómez-Dantés H. [Arbovirus causing hemorrhagic fever at IMSS]. *Rev*  
435 *Medica Inst Mex Seguro Soc.* 2006 Aug;44(4):347–53.
- 436 16. Mavian C, Rife BD, Dollar JJ, Cella E, Ciccozzi M, Prosperi MCF, et al. Emergence of recombinant  
437 Mayaro virus strains from the Amazon basin. *Sci Rep* [Internet]. 2017 Aug 18 [cited 2020 Aug 25];7.  
438 Available from: <https://www.ncbi.nlm.nih.gov/pmc/articles/PMC5562835/>
- 439 17. Powers AM, Aguilar PV, Chandler LJ, Brault AC, Meakins TA, Watts D, et al. Genetic relationships  
440 among Mayaro and Una viruses suggest distinct patterns of transmission. *Am J Trop Med Hyg.* 2006  
441 Sep;75(3):461–9.
- 442 18. Fros JJ, Liu WJ, Prow NA, Geertsema C, Ligtenberg M, Vanlandingham DL, et al. Chikungunya Virus  
443 Nonstructural Protein 2 Inhibits Type I/II Interferon-Stimulated JAK-STAT Signaling. *J Virol.* 2010 Oct  
444 15;84(20):10877–87.
- 445 19. Nguyen L-T, Schmidt HA, von Haeseler A, Minh BQ. IQ-TREE: A Fast and Effective Stochastic  
446 Algorithm for Estimating Maximum-Likelihood Phylogenies. *Mol Biol Evol.* 2015 Jan 1;32(1):268–74.
- 447 20. Schwarz G. Estimating the Dimension of a Model. *Ann Stat.* 1978 Mar;6(2):461–4.
- 448 21. Hoang DT, Chernomor O, von Haeseler A, Minh BQ, Vinh LS. UFBoot2: Improving the Ultrafast  
449 Bootstrap Approximation. *Mol Biol Evol.* 2018 Feb 1;35(2):518–22.
- 450 22. Korber B, Myers G. Signature pattern analysis: a method for assessing viral sequence relatedness.  
451 *AIDS Res Hum Retroviruses.* 1992 Sep;8(9):1549–60.
- 452 23. Pond SLK, Frost SDW, Muse SV. HyPhy: hypothesis testing using phylogenies. *Bioinformatics.* 2005  
453 Mar 1;21(5):676–9.
- 454 24. Murrell B, Moola S, Mabona A, Weighill T, Sheward D, Kosakovsky Pond SL, et al. FUBAR: a fast,  
455 unconstrained bayesian approximation for inferring selection. *Mol Biol Evol.* 2013 May;30(5):1196–  
456 205.
- 457 25. Detecting Individual Sites Subject to Episodic Diversifying Selection [Internet]. [cited 2021 Jun 12].  
458 Available from: <https://journals.plos.org/plosgenetics/article?id=10.1371/journal.pgen.1002764>
- 459 26. Pettersen EF, Goddard TD, Huang CC, Couch GS, Greenblatt DM, Meng EC, et al. UCSF Chimera--  
460 a visualization system for exploratory research and analysis. *J Comput Chem.* 2004  
461 Oct;25(13):1605–12.
- 462 27. Schnierle BS. Cellular Attachment and Entry Factors for Chikungunya Virus. *Viruses* [Internet]. 2019  
463 Nov 19 [cited 2020 Sep 20];11(11). Available from:  
464 <https://www.ncbi.nlm.nih.gov/pmc/articles/PMC6893641/>
- 465 28. Porta J, Jose J, Roehrig JT, Blair CD, Kuhn RJ, Rossmann MG. Locking and Blocking the Viral  
466 Landscape of an Alphavirus with Neutralizing Antibodies. *J Virol.* 2014 Sep;88(17):9616–23.
- 467 29. Weber C, Berberich E, Rhein C von, Henß L, Hildt E, Schnierle BS. Identification of Functional  
468 Determinants in the Chikungunya Virus E2 Protein. *PLoS Negl Trop Dis.* 2017 Jan  
469 23;11(1):e0005318.
- 470 30. Freitas RB, da Rosa JFT, LeDuc JW, Pinheiro FP, Gabbay YB, Mello WA. An Outbreak of Mayaro  
471 Virus Disease in Belterra, Brazil: I. Clinical and Virological Findings\*. *Am J Trop Med Hyg.* 1981 May  
472 1;30(3):674–81.

- 473 31. Tsetsarkin KA, Vanlandingham DL, McGee CE, Higgs S. A Single Mutation in Chikungunya Virus  
474 Affects Vector Specificity and Epidemic Potential. *PLOS Pathog*. 2007 Dec 7;3(12):e201.
- 475 32. Vogel P, Kell WM, Fritz DL, Parker MD, Schoepp RJ. Early events in the pathogenesis of eastern  
476 equine encephalitis virus in mice. *Am J Pathol*. 2005 Jan;166(1):159–71.
- 477 33. Nees TA, Rosshirt N, Zhang JA, Reiner T, Sorbi R, Tripel E, et al. Synovial Cytokines Significantly  
478 Correlate with Osteoarthritis-Related Knee Pain and Disability: Inflammatory Mediators of Potential  
479 Clinical Relevance. *J Clin Med* [Internet]. 2019 Aug 29 [cited 2020 Aug 23];8(9). Available from:  
480 <https://www.ncbi.nlm.nih.gov/pmc/articles/PMC6780543/>
- 481 34. Osada N, Kohara A, Yamaji T, Hirayama N, Kasai F, Sekizuka T, et al. The Genome Landscape of  
482 the African Green Monkey Kidney-Derived Vero Cell Line. *DNA Res*. 2014 Dec 1;21(6):673–83.
- 483 35. Wong RS. Apoptosis in cancer: from pathogenesis to treatment. *J Exp Clin Cancer Res CR*. 2011  
484 Sep 26;30(1):87.
- 485 36. Tanabe ISB, Tanabe ELL, Santos EC, Martins WV, Araújo IMTC, Cavalcante MCA, et al. Cellular  
486 and Molecular Immune Response to Chikungunya Virus Infection. *Front Cell Infect Microbiol*  
487 [Internet]. 2018 Oct 10 [cited 2020 Aug 19];8. Available from:  
488 <https://www.ncbi.nlm.nih.gov/pmc/articles/PMC6191487/>
- 489 37. Teijaro JR. Type I interferons in viral control and immune regulation. *Curr Opin Virol*. 2016  
490 Feb;16:31–40.
- 491 38. Kendall RT, Feghali-Bostwick CA. Fibroblasts in fibrosis: novel roles and mediators. *Front Pharmacol*  
492 [Internet]. 2014 May 27 [cited 2020 Aug 19];5. Available from:  
493 <https://www.ncbi.nlm.nih.gov/pmc/articles/PMC4034148/>
- 494 39. Ma DY, Suthar MS. Mechanisms of innate immune evasion in re-emerging RNA viruses. *Curr Opin*  
495 *Virol*. 2015 Jun;12:26–37.
- 496 40. Vaney M-C, Duquerroy S, Rey FA. Alphavirus structure: activation for entry at the target cell surface.  
497 *Curr Opin Virol*. 2013 Apr;3(2):151–8.
- 498 41. Korber B, Fischer WM, Gnanakaran S, Yoon H, Theiler J, Abfalterer W, et al. Tracking Changes in  
499 SARS-CoV-2 Spike: Evidence that D614G Increases Infectivity of the COVID-19 Virus. *Cell*. 2020  
500 Aug 20;182(4):812-827.e19.
- 501 42. Plante JA, Liu Y, Liu J, Xia H, Johnson BA, Lokugamage KG, et al. Spike mutation D614G alters  
502 SARS-CoV-2 fitness. *Nature*. 2021 Apr;592(7852):116–21.
- 503 43. Zhang L, Jackson CB, Mou H, Ojha A, Rangarajan ES, IZard T, et al. The D614G mutation in the  
504 SARS-CoV-2 spike protein reduces S1 shedding and increases infectivity. *bioRxiv* [Internet]. 2020  
505 Jun 12 [cited 2021 Jun 12]; Available from: <https://www.ncbi.nlm.nih.gov/pmc/articles/PMC7310631/>
- 506 44. Figueiredo MLG de, Figueiredo LTM. Emerging alphaviruses in the Americas: Chikungunya and  
507 Mayaro. *Rev Soc Bras Med Trop*. 2014 Dec;47(6):677–83.
- 508 45. Rozen-Gagnon K, Stapleford KA, Mongelli V, Blanc H, Failloux A-B, Saleh M-C, et al. Alphavirus  
509 Mutator Variants Present Host-Specific Defects and Attenuation in Mammalian and Insect Models.  
510 *PLoS Pathog* [Internet]. 2014 Jan 16 [cited 2020 Aug 23];10(1). Available from:  
511 <https://www.ncbi.nlm.nih.gov/pmc/articles/PMC3894214/>

- 512 46. Liang G, Gao X, Gould EA. Factors responsible for the emergence of arboviruses; strategies,  
513 challenges and limitations for their control. *Emerg Microbes Infect.* 2015 Jan 1;4(1):1–5.
- 514 47. Mavian C, Dulcey M, Munoz O, Salemi M, Vittor AY, Capua I. Islands as Hotspots for Emerging  
515 Mosquito-Borne Viruses: A One-Health Perspective. *Viruses.* 2018 25;11(1).
- 516 48. Long KC, Ziegler SA, Thangamani S, Hausser NL, Kochel TJ, Higgs S, et al. Experimental  
517 transmission of Mayaro virus by *Aedes aegypti*. *Am J Trop Med Hyg.* 2011 Oct;85(4):750–7.
- 518 49. Hotez PJ, Murray KO. Dengue, West Nile virus, chikungunya, Zika—and now Mayaro? Gubler DJ,  
519 editor. *PLoS Negl Trop Dis.* 2017 Aug 31;11(8):e0005462.
- 520 50. Mackay IM, Arden KE. Mayaro virus: a forest virus primed for a trip to the city? *Microbes Infect.* 2016  
521 Dec;18(12):724–34.
- 522
- 523

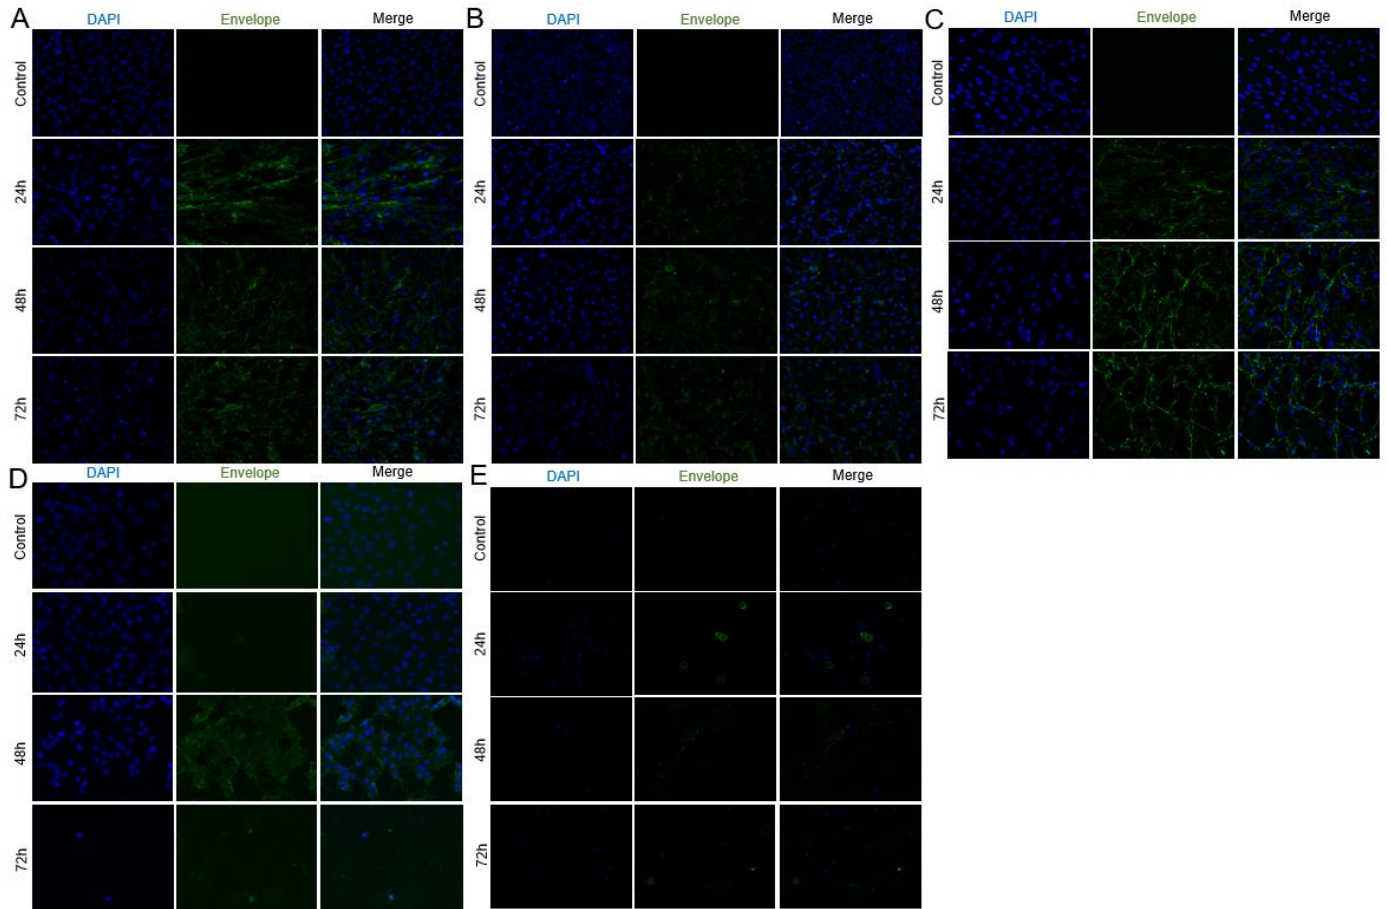

524

525 **Fig 1: Immunofluorescence confocal microscopy of MAYV infection in target cells.** Cells (A: Fibroblasts;  
526 B: HEK293T; C: SkMc; D: Vero; E: Macrophages) were infected with MAYV-U at an MOI=1 for 24, 48, or 72  
527 hours. Cells were then incubated with Anti Eastern Equine Encephalitis primary antibody that is broadly  
528 specific to alphavirus envelope at 1:1000 for detection of MAYV envelope. Cells were then washed and  
529 incubated with Goat anti-Mouse IgG Alexa Fluor 488 secondary antibody at 1:1000 for primary Ab detection.  
530 The cells were lastly stained with DAPI 1:1000 and imaged at 20x using confocal microscopy. Images were Z-  
531 Staked, deconvoluted, and renormalized for processing.

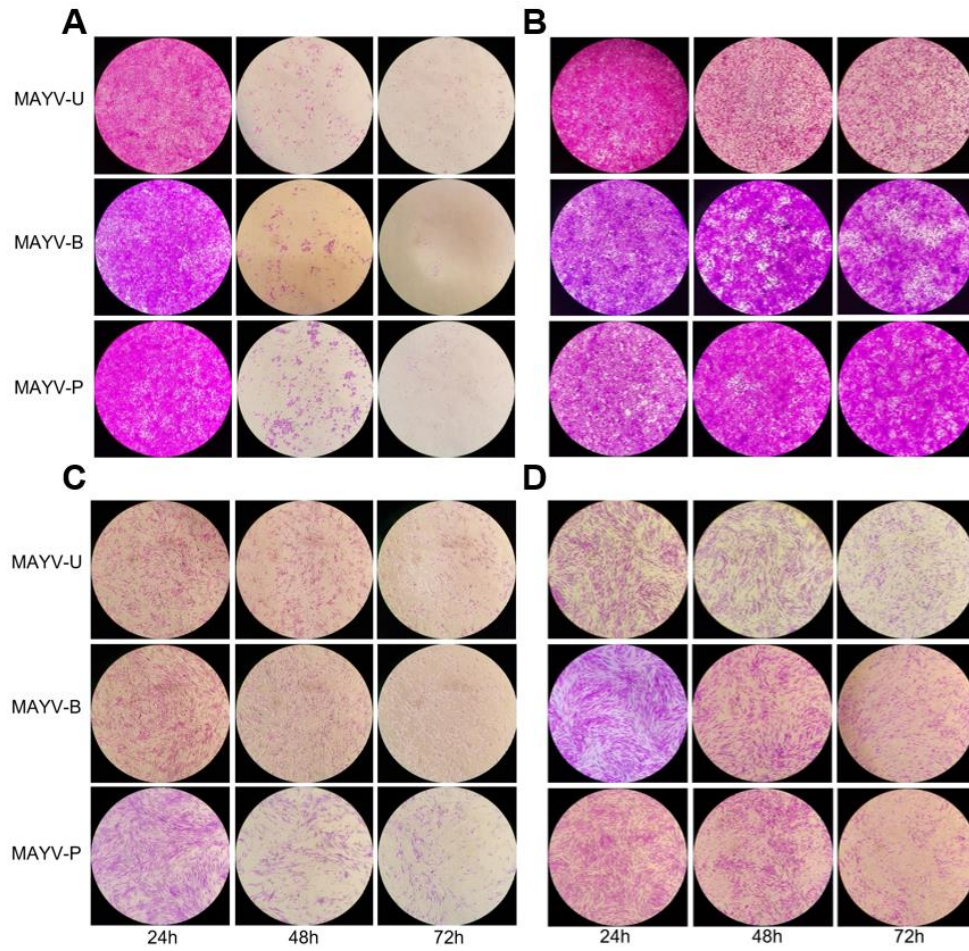

532

533 **Fig 2: Evaluation of MAYV cytopathic effect** Cells (A: Vero; B: HEK293T; C: SkMc; D: Fibroblasts) were  
534 infected at an MOI=1 and incubated for the specified time point. Cells were then stained with crystal violet and  
535 imaged to evaluate the cytopathic effects.

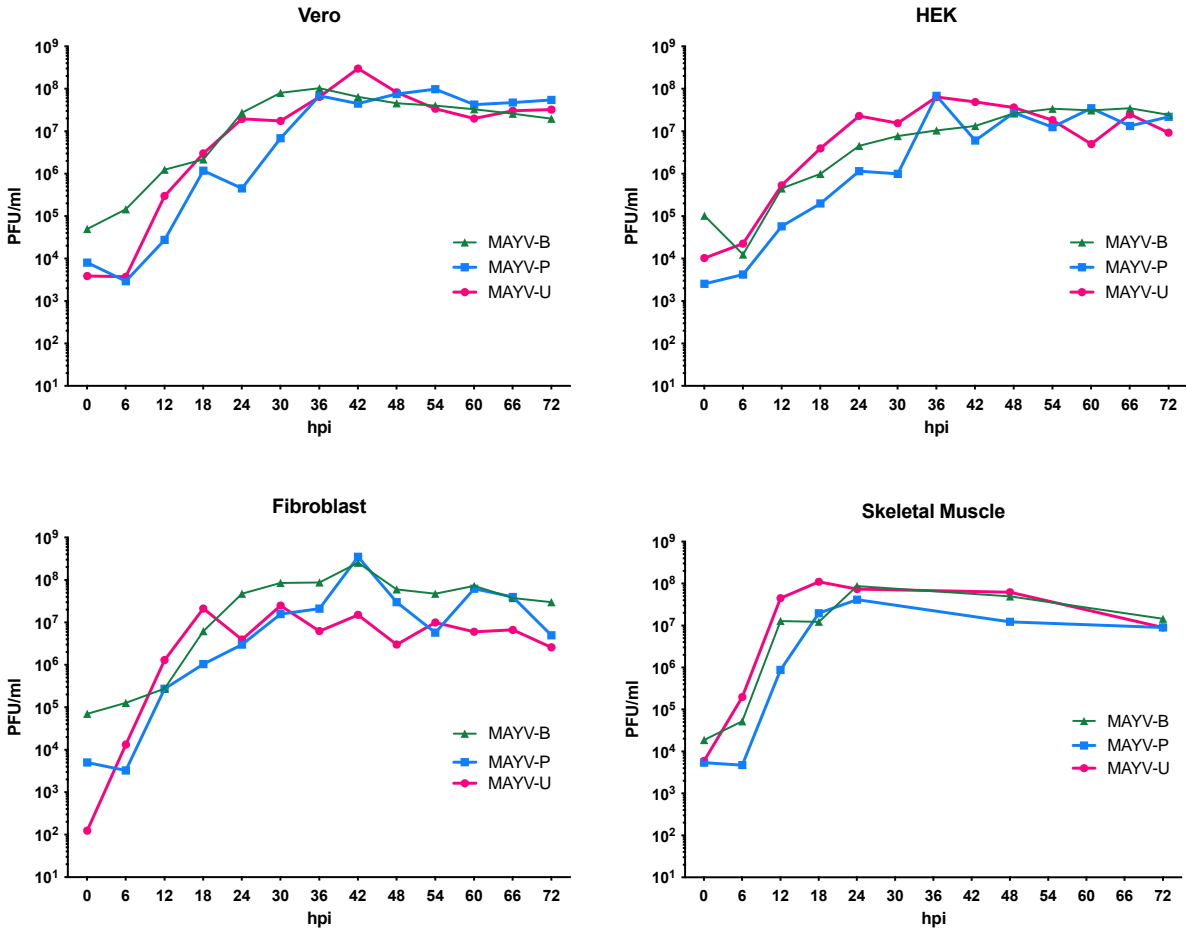

536

537 **Fig 3: Mayaro viral replication kinetics.** MAYV isolates Brazil, Uruma, Peru were inoculated at an MOI 1 on

538 (A: Vero; B: HEK293T; C: Fibroblasts; D: SkMc) Viral titers were determined up to 72h p.i.

539



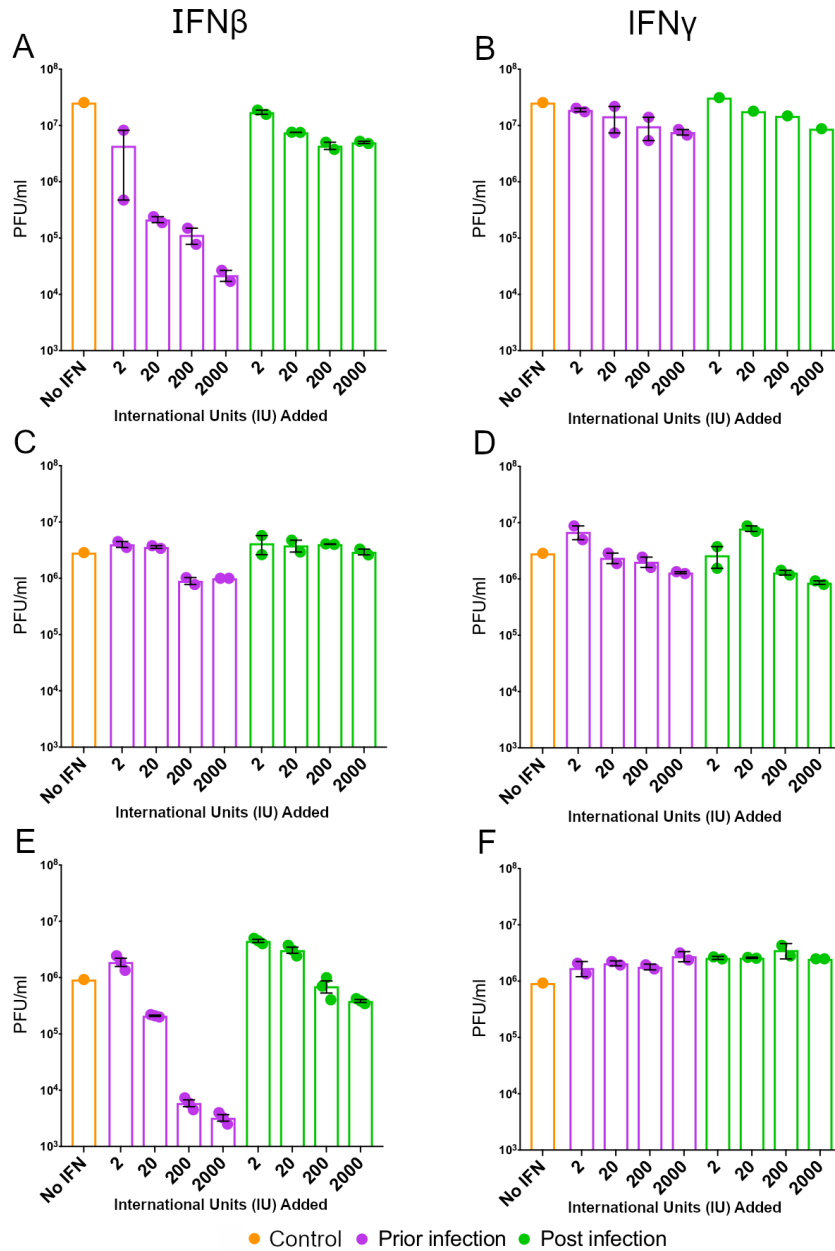

540

● Control ● Prior infection ● Post infection

541 **Fig 4: Treatment with IFN $\beta$  and IFN $\gamma$  pre and post MAYV-U infection. A-B Fibroblasts; C-D HEK293T; E-F**

542 Vero. Cells were either infected with MAYV-U at a MOI =1 either prior to or after IFN  $\beta$  or  $\gamma$  treatment at 2, 20,

543 200, and 2000 IU/ml. Cell supernatants were harvested at their respective 24-hour time point and titered by

544 plaque assay.

545

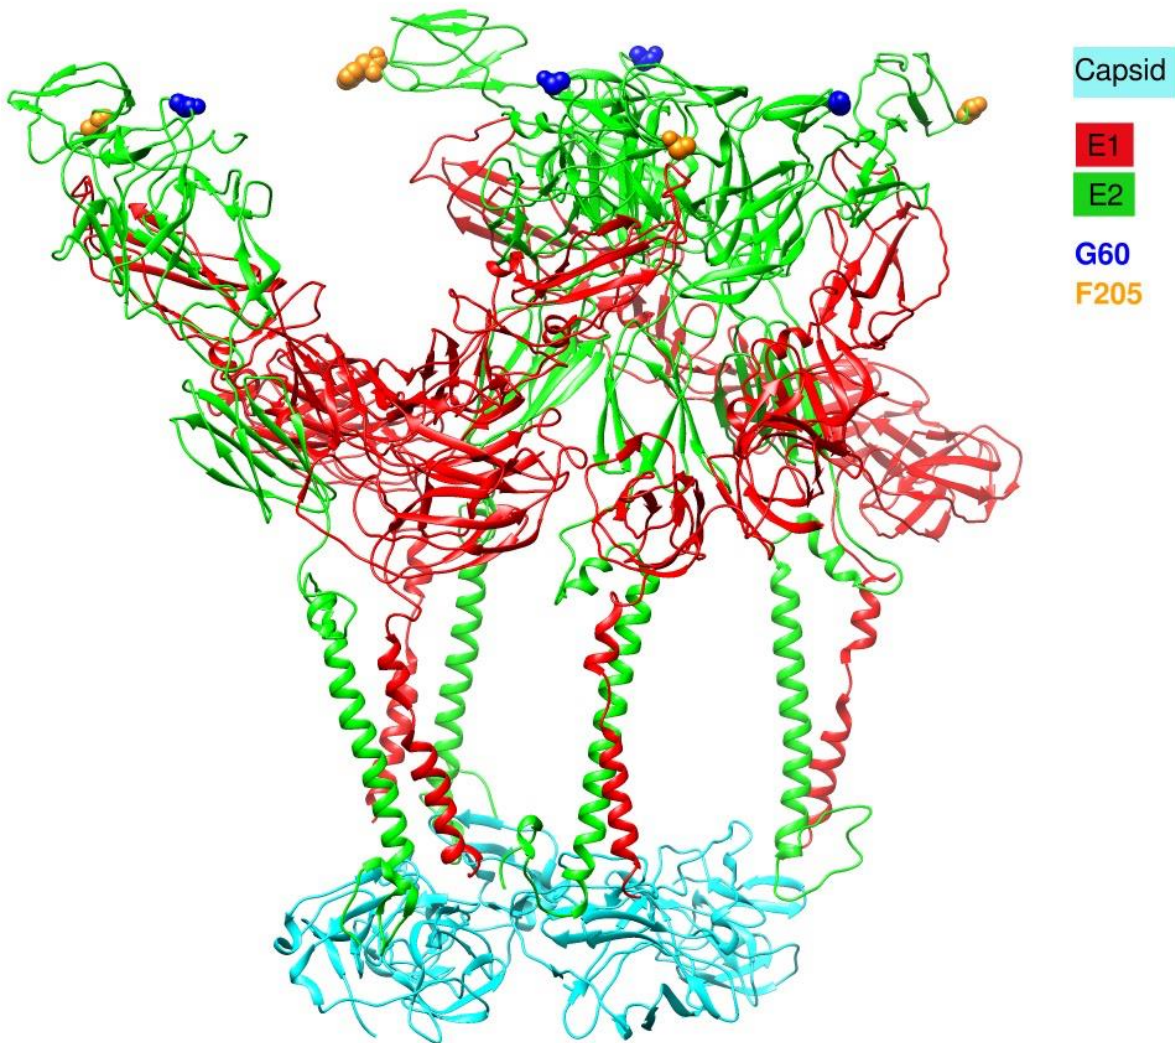

546

547 **Fig 5: Mapping of the mutations of interest (G60 and F205) on the 3D structure of E2 protein.** 3D  
548 structure of the recently available Cryo-EM structure of the mature and infective Mayaro virus (PDB ID 7KO8);  
549 G60 and F205 are represented in blue and yellow, respectively. The E1 and E2 proteins are shown in red and  
550 green, respectively, and the capsid in cyan.  
551

552

553

554

555

| Genotype D       |                     |                                                                                                                                               |
|------------------|---------------------|-----------------------------------------------------------------------------------------------------------------------------------------------|
| Name             | 5'-3' Sequence      | GenBank Reference Sequences Used                                                                                                              |
| D Site 1 Forward | CACAGGAGTGGGTAAGCC  | Accession #: KP842804, KP842805, KP842806, KP842807, KP842809, KP842810, KP842811, KP842812, KP842813, KP842814, KP842815, KP842816, KP842817 |
| D Site 1 Reverse | GAAGTGTCCCATCGTTCC  |                                                                                                                                               |
| D Site 2 Forward | GATGCTACAGACGGCACG  |                                                                                                                                               |
| D Site 2 Reverse | GGAATGTGCACCTTGCCC  |                                                                                                                                               |
| D Site 3 Forward | CAGGCATATGTCACGAGC  |                                                                                                                                               |
| D Site 3 Reverse | CATCCAGAACATTGACTGG |                                                                                                                                               |
| D Site 4 Forward | CACCGAAAGCGCATGCAG  |                                                                                                                                               |
| D Site 4 Reverse | GTTACATACGCTCGAC    |                                                                                                                                               |
| D Site 5 Forward | CAGATGAGTGAAGCCTACG |                                                                                                                                               |
| D Site 5 Reverse | GCGTGCATGTAGATACAG  |                                                                                                                                               |
| Genotype L       |                     |                                                                                                                                               |
| Name             | Sequence            | GenBank Reference Sequences Used                                                                                                              |
| L Site 1 Forward | CAGGAGTGGGTAAGCCTG  | Accession #: KP842818, KP842819, KP842820                                                                                                     |
| L Site 1 Reverse | GTTACCGTGCACTCACTG  |                                                                                                                                               |
| L Site 2 Forward | GGACACGCACGATCACAC  |                                                                                                                                               |
| L Site 2 Reverse | GCTCTGCTTGCTCCGCAC  |                                                                                                                                               |
| L Site 3 Forward | GGTACAGCTGCTCTTGCG  |                                                                                                                                               |
| L Site 3 Reverse | CGGTGCGCAACACAGCAC  |                                                                                                                                               |
| L Site 4 Forward | CTACGGACTGCATCCTAC  |                                                                                                                                               |
| L Site 4 Reverse | CACACCTGTGAACACTGC  |                                                                                                                                               |
| L Site 5 Forward | CCTGGAGTATATCACTTGC |                                                                                                                                               |
| L Site 5 Reverse | GTGCACGTCAACTCAGAG  |                                                                                                                                               |

556

557

558 **S1 Table: Mayaro virus primers for D and L genotype envelope protein.** Five overlapping primer sets

559 spanning the envelope protein (E3, E2, 6K, E1) for D and L, MAYV genotypes were constructed using

560 reference sequences obtained from Genbank.

561

562

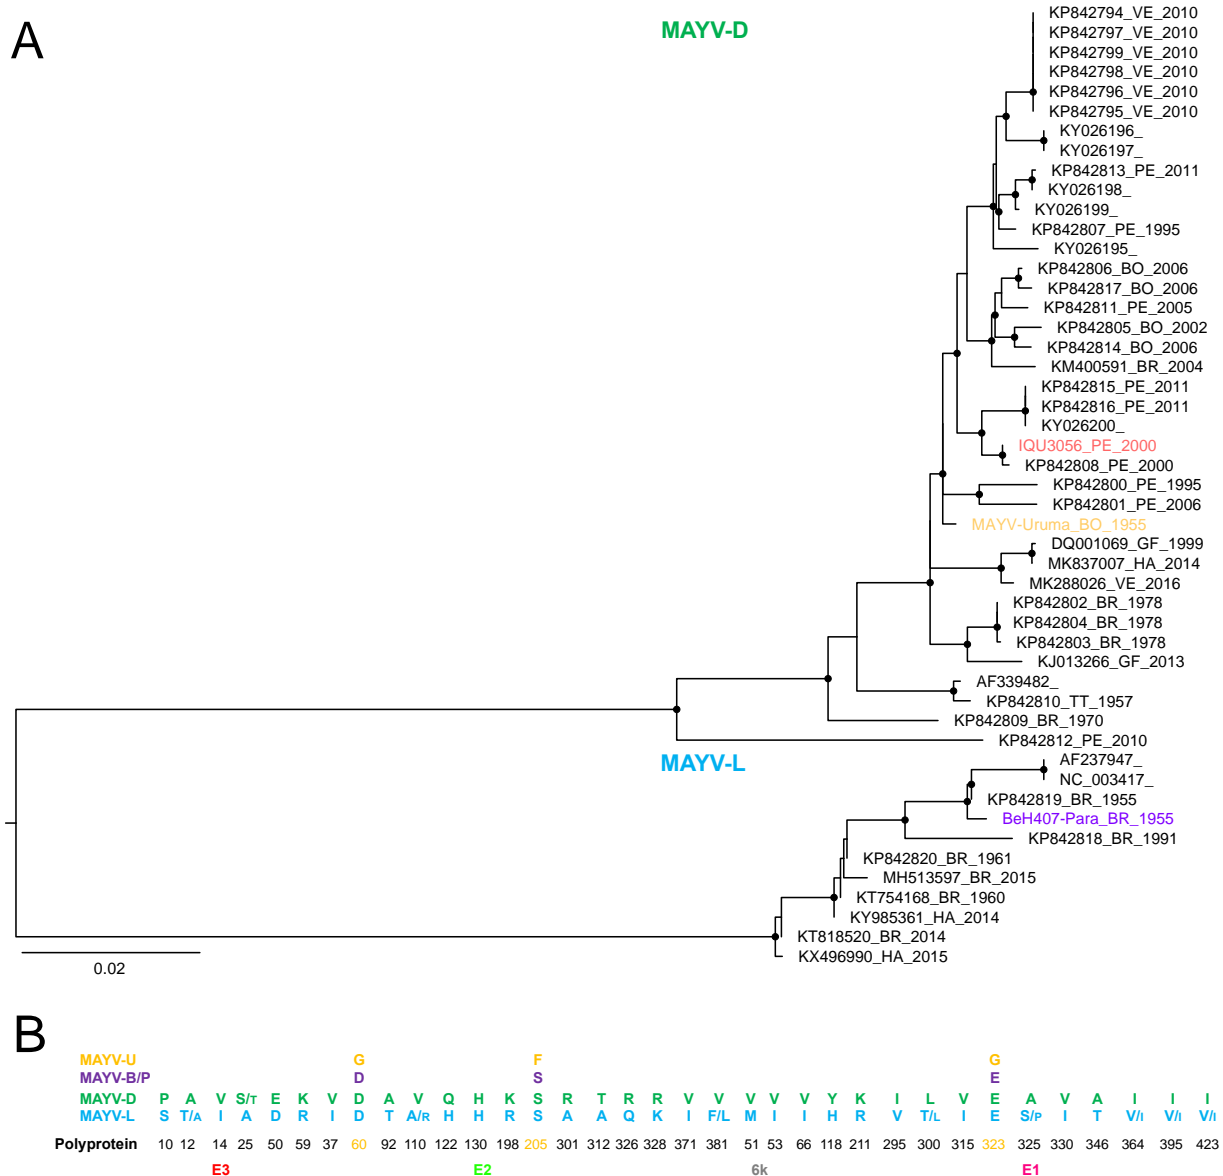

563

564 **Figure S1: Phylogenetic inference of the structural polyprotein (E3-E2-E1) of MAYV and signature**

565 **pattern analysis for MAYVL and MAYVD.** Maximum likelihood phylogenetic inference of MAYV E3-E2-E1

566 sequences obtained from GenBank and of MAYV-U, MAYV-P or MAYV-B obtained from this study. Below the

567 tree is given the schematic representation of the polyprotein is given and above it the blue box contains the

568 residues that distinguish MAYVD from MAYDL as for the signature pattern analysis: the numbers correspond

569 to the residues for each protein based on DQ487395. Above, specific residues positions of interest that are

570 unique to MAYV-U are indicated in yellow MAYV-U, while residues found in MAYV-P and MAYV-B are in

571 purple. In green and in blue are indicated residues found in MAYV-D and MAYD-L, respectively. Smaller letters

572 indicate that the residue is found at lower frequency.

573
